# Supplementary material
Source: bioRxiv or medRxiv preprint supplement (https://medrxiv.org/highwire/filestream/86991/field_highwire_adjunct_files/0/2020.06.22.20135434-1.pdf)
Supplement: Supplementary file [file 2020.06.22.20135434-1.pdf]

# Systematic review of health state utility values used in European pharmacoeconomic evaluations for chronic hepatitis C: impact on cost-effectiveness results

## Applied Health Economics and Health Policy

Ru Han<sup>1,2\*</sup>, Clément François<sup>1,2</sup>, Mondher Toumi<sup>1,2</sup>

<sup>1</sup>University of Aix-Marseille, Marseille, France;

<sup>2</sup>Creativ-Ceutical, Paris, France;

\*Corresponding author: [rha@creativ-ceutical.com](mailto:rha@creativ-ceutical.com)

Email address: [cfr@creativ-ceutical.com](mailto:cfr@creativ-ceutical.com); [mondher.TOUMI@univ-amu.fr](mailto:mondher.TOUMI@univ-amu.fr);

Address: 215, rue de Faubourg St-Honoré 75008 Paris

## Supplementary file 1.1 Search strategy for studies in Medline and Embase via Ovid

| ID  | Category                                      | Search terms                                                                                                                                           | Hits                                                                                                                                                                                                       |            |
|-----|-----------------------------------------------|--------------------------------------------------------------------------------------------------------------------------------------------------------|------------------------------------------------------------------------------------------------------------------------------------------------------------------------------------------------------------|------------|
| #1  | Population                                    | exp "hepatitis C"/                                                                                                                                     | 174,360                                                                                                                                                                                                    |            |
| #2  |                                               | ("Hepatitis C virus" or "Hepatitis C viruses").mp.                                                                                                     | 139,498                                                                                                                                                                                                    |            |
| #3  |                                               | HCV.mp.                                                                                                                                                | 150,571                                                                                                                                                                                                    |            |
| #4  |                                               | Hepaciviruses.mp.                                                                                                                                      | 165                                                                                                                                                                                                        |            |
| #5  |                                               | ("Hepatitis C-Like Viruses" or "Hepatitis C-Like Virus" or "Hepatitis C Like Viruses" ) .mp.                                                           | 31                                                                                                                                                                                                         |            |
| #6  |                                               | or/1-5                                                                                                                                                 | 246,721                                                                                                                                                                                                    |            |
| #7  |                                               | Intervention                                                                                                                                           | ("treatment" or "treating" or "drug" or "pharmaceutical").mp.                                                                                                                                              | 22,240,160 |
| #8  |                                               |                                                                                                                                                        | ("interferon" or "IFN" or "ribavirin").mp.                                                                                                                                                                 | 633,951    |
| #9  |                                               |                                                                                                                                                        | ("sofosbuvir" or "daclatasvir" or "ledipasvir" or "paritaprevir" or "ombitasvir" or "ritonavir" or "dasabuvir" or "velpatasvir" or "voxilaprevir" or "grazoprevir" or "glecaprevir" or "pibrentasvir").mp. | 45,008     |
| #10 |                                               |                                                                                                                                                        | or/ 7-9                                                                                                                                                                                                    | 22,468,153 |
| #11 | Model                                         | model*.mp.                                                                                                                                             | 8,167,108                                                                                                                                                                                                  |            |
| #12 | Evaluation type                               | exp "cost utility analysis"/ or exp "cost benefit analysis"/ or exp "cost minimization analysis"/ or exp "cost"/ or exp "cost effectiveness analysis"/ | 730,337                                                                                                                                                                                                    |            |
| #13 |                                               | exp health economics/                                                                                                                                  | 817,066                                                                                                                                                                                                    |            |
| #14 |                                               | ("cost analysis" or cost-analysis or cost analyses or cost-analyses).mp.                                                                               | 67,047                                                                                                                                                                                                     |            |
| #15 |                                               | ("cost effective*" or cost-effective*).mp.                                                                                                             | 364,353                                                                                                                                                                                                    |            |
| #16 |                                               | ("cost benefit*" or cost-benefit*).mp.                                                                                                                 | 173,613                                                                                                                                                                                                    |            |
| #17 |                                               | ("cost consequence*" or cost-consequence*).mp.                                                                                                         | 1,408                                                                                                                                                                                                      |            |
| #18 |                                               | ("cost utility" or cost-utility).mp.                                                                                                                   | 15,619                                                                                                                                                                                                     |            |
| #19 |                                               | ("cost minimization" or cost-minimization or "cost minimisation" or cost-minimisation).mp.                                                             | 5,386                                                                                                                                                                                                      |            |
| #20 |                                               | cost*.mp.                                                                                                                                              | 1,675,936                                                                                                                                                                                                  |            |
| #21 |                                               | economic*.mp.                                                                                                                                          | 1,288,336                                                                                                                                                                                                  |            |
| #22 | (pharmacoeconomic* or pharmaco-economic*).mp. | 90,581                                                                                                                                                 |                                                                                                                                                                                                            |            |
| #23 | or/12-22                                      | 2,762,485                                                                                                                                              |                                                                                                                                                                                                            |            |
| #24 | Final                                         | 6 and 10 and 11 and 23                                                                                                                                 | 2,790                                                                                                                                                                                                      |            |
| #25 |                                               | limit 24 to yr="2017-Current"                                                                                                                          | 923                                                                                                                                                                                                        |            |

## Supplementary file 1.2. Inclusion/exclusion criteria

| Criteria elements            | Inclusion criteria                                      | Exclusion criteria                                                 |
|------------------------------|---------------------------------------------------------|--------------------------------------------------------------------|
| <b>Population</b>            | Adult patients (aged 18 years) with chronic hepatitis C | None                                                               |
| <b>Intervention</b>          | All treatment strategies including DAAs and interferon  | Prevention, screening and diagnosis strategies                     |
| <b>Comparator</b>            | No treatment or with other treatment strategies         | None                                                               |
| <b>Outcomes of interest</b>  | Elicited utility weights                                | None                                                               |
| <b>Study</b>                 | Model-based pharmacoeconomic evaluation                 | Budget impact analysis, cost-of-illness analysis or clinical trial |
| <b>Publication timeframe</b> | Published after 2017 to the present                     | None                                                               |
| <b>Geographical scope</b>    | Economic studies conducted in European countries        | Reporting data on non-European countries only                      |
| <b>Language</b>              | English language                                        | The other languages                                                |

## Supplementary file1.3. Framework of quality assessment of HSUVs used in CUAs

| Domain                   | Criteria                    | Scores and description                                                                                |                                                                                                  |                                                                           |
|--------------------------|-----------------------------|-------------------------------------------------------------------------------------------------------|--------------------------------------------------------------------------------------------------|---------------------------------------------------------------------------|
| Identification of source | Systematic review           | 0                                                                                                     | 1                                                                                                | 2                                                                         |
|                          |                             | No source and value of HSUVs reported                                                                 | Source reported but not identified through systematic review                                     | Systematic review conducted to identify the relevant HSUVs                |
|                          | Sensitivity analysis        | 0                                                                                                     | 1                                                                                                | 2                                                                         |
|                          |                             | No sensitivity analysis or scenario analysis of HSUVs and justification                               | Sensitivity analysis conducted but no range and source of HSUVs reported                         | Sensitivity analysis conducted with source reported                       |
| Methodological quality   | Elicitation method          | 0                                                                                                     | 1                                                                                                | 2                                                                         |
|                          |                             | No description of elicitation method for HSUVs and choice of method                                   | Description for one or more HSUVs but not for all or no choice of method                         | Complete description of each HSUV provided and choice of method           |
|                          | Responder                   | 0                                                                                                     | 1                                                                                                | 2                                                                         |
|                          |                             | No description of responder (characteristic, size and nationality)                                    | Partial description of responder and choice of responder                                         | Complete description of responder and choice of responder                 |
| Appropriate application  | Population comparability    | 0                                                                                                     | 1                                                                                                | 2                                                                         |
|                          |                             | Different population (diagnosis, severity and risk groups) and country without reasonable explanation | Different population and county between CUAs and elicitation studies with reasonable explanation | The same population and country in CUAs as in utility elicitation studies |
|                          | Health states comparability | 0                                                                                                     | 1                                                                                                | 2                                                                         |
|                          |                             | Different health states and HSUVs in the CUA without explanation                                      | Different health states and HSUVs with explanation on derivation method                          | The same health states and HSUVs or with complete interpretation          |
|                          | Discussion on proper use    | 0                                                                                                     | 1                                                                                                | 2                                                                         |
|                          |                             | No discussion on the use of HSUVs by other researchers in CUAs                                        | Incomplete discussion of limitations and use of HSUVs                                            | Complete discussion of limitations and use of HSUVs                       |

## Supplementary file1.4. Input of baseline characteristic, transition probability, efficacy and costs from Johnson 2016

Table 1 Baseline characteristics

| Variable                   | Value           |                       |
|----------------------------|-----------------|-----------------------|
|                            | Treatment naïve | Treatment experienced |
| Age                        | 40.0            | 45.0                  |
| Male                       | 70.0%           | 70.0%                 |
| F0-F3 (Chronic HCV)        | 90.0%           | 68.0%                 |
| F4 (compensated cirrhosis) | 10.0%           | 32.0%                 |
| Treatment experience       | 28.9%           | 71.1%                 |

**Table 2 Transition probability**

| Variable                                                            | Value |
|---------------------------------------------------------------------|-------|
| Chronic HCV to compensated cirrhosis                                | 0.037 |
| Chronic HCV to hepatocellular carcinoma                             | 0.000 |
| Compensated cirrhosis to decompensated cirrhosis                    | 0.039 |
| Compensated cirrhosis to hepatocellular carcinoma                   | 0.014 |
| Decompensated cirrhosis to hepatocellular carcinoma                 | 0.014 |
| Recovered without compensated cirrhosis to hepatocellular carcinoma | 0.012 |
| Recovered with compensated cirrhosis to hepatocellular carcinoma    | 0.012 |
| Decompensated cirrhosis to liver transplant                         | 0.020 |
| Hepatocellular carcinoma to liver transplant                        | 0.020 |
| Decompensated cirrhosis to liver-related death                      | 0.130 |
| Liver transplant in the first year to liver-related death           | 0.150 |
| Liver transplant in subsequent years to liver-related death         | 0.057 |
| Hepatocellular carcinoma in the first year to liver-related death   | 0.427 |
| Hepatocellular carcinoma in subsequent years to liver-related death | 0.427 |
| Viral reinfection                                                   | 0.010 |
| Spontaneous remission                                               | 0.000 |

**Table 3 Efficacy and safety**

| Variable                   | Value in ODP | Value in PR |
|----------------------------|--------------|-------------|
| Treatment Naïve            |              |             |
| Chronic HCV                | 0.972        | 0.445       |
| Compensated cirrhosis      | 0.963        | 0.333       |
| Treatment experienced      |              |             |
| Chronic HCV                | 0.974        | 0.158       |
| Compensated cirrhosis      | 0.972        | 0.143       |
| Adverse events             |              |             |
| Any serious adverse events | 0.20%        | 15.30%      |
| Anemia                     | 3.90%        | 19.40%      |
| Rash                       | 7.90%        | 24.40%      |
| Depression                 | 0.00%        | 21.90%      |

**Table 4 Costs**

| Variable                                        | Value   |
|-------------------------------------------------|---------|
| Annual health state-related costs               |         |
| Chronic HCV                                     | £681    |
| Compensated cirrhosis                           | £1,841  |
| No HCV                                          | £0      |
| Recovered without compensated cirrhosis         | £419    |
| Recovered with compensated cirrhosis            | £921    |
| Decompensated cirrhosis                         | £14,755 |
| Hepatocellular carcinoma in the first year      | £13,148 |
| Hepatocellular carcinoma in subsequent years    | £13,148 |
| Liver transplant in the first year              | £59,518 |
| Liver transplant in subsequent years            | £2,241  |
| Daily drug costs                                |         |
| ODP                                             | £429    |
| PR                                              | £34     |
| Treatment monitoring costs per treatment course |         |

|                                                          |        |
|----------------------------------------------------------|--------|
| ODP                                                      | £661   |
| PR                                                       | £1,127 |
| Treatment costs of drug-related adverse events per event |        |
| Any serious adverse events                               | £1,874 |
| Anemia                                                   | £507   |
| Rash                                                     | £168   |
| Depression                                               | £418   |

**Table 5 UK life table**

| Age | Value (Males) | Value (Females) |
|-----|---------------|-----------------|
| 18  | 0.00040       | 0.00021         |
| 19  | 0.00044       | 0.00020         |
| 20  | 0.00047       | 0.00020         |
| 21  | 0.00050       | 0.00021         |
| 22  | 0.00049       | 0.00020         |
| 23  | 0.00053       | 0.00023         |
| 24  | 0.00054       | 0.00022         |
| 25  | 0.00062       | 0.00024         |
| 26  | 0.00057       | 0.00027         |
| 27  | 0.00061       | 0.00028         |
| 28  | 0.00068       | 0.00031         |
| 29  | 0.00068       | 0.00033         |
| 30  | 0.00073       | 0.00038         |
| 31  | 0.00077       | 0.00040         |
| 32  | 0.00093       | 0.00048         |
| 33  | 0.00089       | 0.00050         |
| 34  | 0.00098       | 0.00051         |
| 35  | 0.00103       | 0.00059         |
| 36  | 0.00116       | 0.00066         |
| 37  | 0.00119       | 0.00073         |
| 38  | 0.00124       | 0.00073         |
| 39  | 0.00139       | 0.00084         |
| 40  | 0.00150       | 0.00093         |
| 41  | 0.00171       | 0.00098         |
| 42  | 0.00181       | 0.00108         |
| 43  | 0.00199       | 0.00114         |
| 44  | 0.00210       | 0.00129         |
| 45  | 0.00220       | 0.00144         |
| 46  | 0.00237       | 0.00153         |
| 47  | 0.00274       | 0.00166         |
| 48  | 0.00280       | 0.00178         |
| 49  | 0.00311       | 0.00192         |
| 50  | 0.00340       | 0.00214         |
| 51  | 0.00350       | 0.00235         |
| 52  | 0.00381       | 0.00258         |
| 53  | 0.00397       | 0.00281         |
| 54  | 0.00441       | 0.00301         |
| 55  | 0.00492       | 0.00329         |
| 56  | 0.00547       | 0.00361         |
| 57  | 0.00587       | 0.00386         |
| 58  | 0.00637       | 0.00423         |

|     |         |         |
|-----|---------|---------|
| 59  | 0.00703 | 0.00476 |
| 60  | 0.00796 | 0.00517 |
| 61  | 0.00861 | 0.00562 |
| 62  | 0.00932 | 0.00628 |
| 63  | 0.01048 | 0.00686 |
| 64  | 0.01145 | 0.00732 |
| 65  | 0.01224 | 0.00788 |
| 66  | 0.01350 | 0.00888 |
| 67  | 0.01460 | 0.00961 |
| 68  | 0.01561 | 0.01035 |
| 69  | 0.01723 | 0.01152 |
| 70  | 0.01884 | 0.01267 |
| 71  | 0.02131 | 0.01424 |
| 72  | 0.02355 | 0.01589 |
| 73  | 0.02602 | 0.01793 |
| 74  | 0.02959 | 0.01967 |
| 75  | 0.03295 | 0.02224 |
| 76  | 0.03643 | 0.02546 |
| 77  | 0.03986 | 0.02746 |
| 78  | 0.04409 | 0.03139 |
| 79  | 0.04921 | 0.03462 |
| 80  | 0.05522 | 0.03968 |
| 81  | 0.06139 | 0.04462 |
| 82  | 0.06929 | 0.05108 |
| 83  | 0.07853 | 0.05843 |
| 84  | 0.08769 | 0.06669 |
| 85  | 0.09819 | 0.07496 |
| 86  | 0.10951 | 0.08545 |
| 87  | 0.12239 | 0.09645 |
| 88  | 0.13706 | 0.10996 |
| 89  | 0.15105 | 0.12363 |
| 90  | 0.16874 | 0.13939 |
| 91  | 0.18600 | 0.15458 |
| 92  | 0.20164 | 0.17162 |
| 93  | 0.22069 | 0.18837 |
| 94  | 0.24303 | 0.20957 |
| 95  | 0.26757 | 0.23369 |
| 96  | 0.28755 | 0.25312 |
| 97  | 0.30529 | 0.26823 |
| 98  | 0.31356 | 0.28397 |
| 99  | 0.34860 | 0.31482 |
| 100 | 0.38566 | 0.34091 |

---
